# Supplementary material for: Global Tree Cover and Biomass Carbon on Agricultural Land: The contribution of agroforestry to global and national carbon budgets
Source: PubMed Central journal article supplement (PMC4951720; doi:10.1038/srep29987), 2016-07-20
Supplement: srep29987-s1.pdf [file srep29987-s1.pdf]

# Global Tree Cover and Biomass Carbon on Agricultural Land: The contribution of agroforestry to global and national carbon budgets

## Supplementary Information

May 14, 2016

**Submitted to:**  
Scientific Reports

Authors:

Robert J. Zomer<sup>1,2</sup>, Henry Neufeldt<sup>3</sup>, Jianchu Xu<sup>1,2\*</sup>, Antje Ahrends<sup>4</sup>, Deborah Bossio<sup>5</sup>,  
Antonio Trabucco<sup>6,7</sup>, Meine van Noordwijk<sup>8,9</sup>, Mingcheng Wang<sup>1</sup>

1. *Key Laboratory for Plant Diversity and Biogeography of East Asia (KLPB), Kunming Institute of Botany, Chinese Academy of Science, Kunming 650201, Yunnan, China*
2. *Centre for Mountain Ecosystem Studies, World Agroforestry Center (ICRAF), East and Central Asia Region, Kunming 650201, China*
3. *World Agroforestry Centre (ICRAF), Nairobi, Kenya*
4. *Royal Botanic Garden Edinburgh, 20A Inverleith Row, Edinburgh, UK, EH3 5LR*
5. *International Center for Tropical Agriculture (CIAT), Soils Division, Nairobi, Kenya*
6. *Euro-Mediterranean Center on Climate Change, IAFES Division, Sassari, Italy. Email:*
7. *Department of Science for Nature and Environmental Resources (DIPNET), University of Sassari, Via De Nicola 9, 07100 Sassari, Italy*
8. *World Agroforestry Center (ICRAF) – Southeast Asia Regional Office, Bogor, Indonesia*
9. *Wageningen University and Research, Plant Production Systems, Wageningen, the Netherlands*

\* Corresponding Author – Email: J.C.Xu@cgiar.org

## Supporting Information - Methods:

To quantify estimates of biomass carbon on agricultural land, IPCC Tier 1 default estimates for carbon stored in a variety of land cover types across bioclimatic strata were combined with tree cover estimates based on 250 m resolution MODIS satellite imagery, to provide a global Tier-1 spatial mapping and tabulation, by region and countries, of biomass carbon on agricultural land for the period 2000-2010.

The spatial modeling procedure was developed and implemented in ArcGIS 10.2 (ESRI Inc.) using both ArcAML and Python programming language. Datasets were re-projected to a sinusoidal projection (World Sinusoidal) in order to calculate zonal statistics and carry out areal computations, as it represents area extent accurately across latitudes (i.e., equal-area projection). The cell size for analyses in sinusoidal projection is 1 km<sup>2</sup>. These datasets are presented in geographic coordinates in the figures, for mapping and presentation purposes.

### *Assessment of Global Tree Cover on Agricultural Land:*

The global geospatial analysis to identify tree cover on agricultural land combined a global assessment of tree cover, based upon a MODIS 250 m resolution satellite remote sensing dataset<sup>31</sup>, with the Global Land Cover 2000 (GLC 2000) land-use classification. Tree cover on agricultural land was identified and results mapped and tabulated; globally, by global region, and by countries. A detailed description of this analysis is available online in a working paper report (Zomer et al, 2014):

[http://www.worldagroforestry.org/sites/default/files/WP89\\_text\\_only.pdf](http://www.worldagroforestry.org/sites/default/files/WP89_text_only.pdf)

### Geodatasets

The geodatasets used in the analysis are listed below.

- MOD44B MODIS Vegetation Continuous Field - Collection 5 (2000 through to 2010):
  - Percent Tree Cover (DiMiceli et al 2011)
- Global Land Cover 2000 (GLC 2000) Database (Bartholomé and Belward, 2005)
- GADM database of global administrative areas, version 2.0[J]. 2012. (GADM, 2012)
- Aridity-Wetness Index (Zomer et al 2007)
  -

### Tree-cover data

The MOD44B MODIS/Terra Vegetation Continuous Fields Dataset (VCF) (Hansen 2003)

was developed by the University of Maryland and provides global estimates of vegetation cover in terms of woody vegetation, herbaceous vegetation and bare-ground percentages. The updated MOD44B MODIS VCF – Collection 5 dataset (DiMiceli et al 2011) used in the current analysis improves upon the earlier versions and provides data at the resolution of 250 m. A limited amount of validation performed using field data from two sites in Maryland and three sites in Brazil, South America show that the Collection 5VCF product is substantially more accurate than previous versions, with accuracy significantly improved within agricultural areas and forest clearings. (User Guide for VCF Collection 5 – Version 1). This data (and a User Guide for VCF Collection 5 – Version 1) is available online at:

<http://www.landcover.org/data/vcf/>

#### Land-cover categories

Three agricultural land-use types from the Global Land Cover Class scheme used for the Global Land Cover 2000 database were selected as relevant for the specific objectives of this work:

- Cultivated and Managed Areas (agriculture — intensive),
- Cropland/Other Natural Vegetation (non-trees: mosaic agriculture/degraded vegetation)
- Cropland/Tree Cover Mosaic (agriculture/degraded forest).

Although at first the Cropland/Tree Cover Mosaic type seems to identify agroforestry systems, the mix of forest and agriculture does not occur at discrete intervals but is a gradient where the two components of landscape-level agroforestry mix within the landscape. The mix of tree cover over agriculture land is depicted along a continuous gradient by the MODIS VCF tree-cover dataset, within the relevant GLC2000 land-cover type. Tree cover shows the percentage of the 1 km<sup>2</sup> grid cell occupied by trees, therefore, at this resolution of 1000 m<sup>2</sup>, the tree-cover percentage can be expressed as hectares (ha) of tree cover per km<sup>2</sup>. At 100% tree cover, the whole grid cell is occupied, that is, 100 ha/km<sup>2</sup>.

The Global Land Cover 2000 database is available online here:

<http://www.gvm.jrc.it/glc2000>

#### Administrative boundaries

The GADM database of Global Administrative Areas was used to define both regional and country boundaries. The GADM database is available online here:

<http://www.gadm.org>

### Aridity–Wetness Index

A global model of aridity (Zomer et al. 2007) was used to stratify ecological conditions based on climatic and agro-ecological characteristics. Aridity is expressed as a function of precipitation, temperature and potential evapotranspiration (PET). Based upon an attempt to classify climatic zones by moisture regime, the Aridity–Wetness Index (AWI) quantifies precipitation deficit over atmospheric water demand as:

- Aridity–Wetness Index (AWI) =  $MAP / MAE$  where:
  - MAP = mean annual precipitation
  - MAE = mean annual evapotranspiration

The AWI dataset is available online here:

<http://csi.cgiar.org/aridity/>

### Global Tree Cover on Agricultural Land

To facilitate the global analysis, the VCF Tree Cover – Collection 5 dataset (250 m resolution) grid cells were aggregated to 1 km<sup>2</sup> resolution. All the geodatasets were masked to exclude areas which are either non-agricultural land-use types or urban areas.

Tree-canopy cover on agricultural land has been tabulated for all years available in the VCF- C5 dataset, that is, from 2000 to 2010. Variation in the estimates from year to year appears to be high and not consistent with the expected year-to-year change. There is a fair amount of ‘noise’ in the year-to-year estimates, which can be expected from having a significant variability associated with the quality of the remote-sensing dataset and seasonal and other confounding factors affecting the classification algorithm used in the VCF-C5 processing. In order to reduce the effect of this variability in estimates of change during the period, we have averaged the first three years of the dataset (2000–2002) and the last three years (2008–2010) and use these averaged results as the beginning and end points for the change analysis. They are further referred to within the text as 2000 and 2010, respectively, to simply presentation of the results.

The extent of agricultural land and various associated tree-canopy cover values have been analyzed, compared, mapped and tabulated globally, and by global regions, countries, and aridity-wetness index zones. Within each stratum, or within specific aggregation of strata, zonal statistical values (mean, sum, total area, percentiles, areal distribution etc) were summarized to describe those factors of interest for this study.

Cumulative agricultural area is presented at decreasing tree-canopy cover to infer at global and subcontinent scales the total area engaged above any specific tree-canopy cover values. In a second stage, the same cumulative distribution of total agricultural

land in function of tree-canopy cover has been disaggregated for five different aridity classes (AWI < 0.45 or arid, 0.45 < AWI < 0.6 or semi-arid, 0.6 < AWI < 0.8 or sub-humid, 0.8 < AWI < 1.0 or humid, AWI >1.0 or very humid) to show how climate regimes might differentiate specific patterns of interdependence between tree-canopy cover and bioclimatic conditions for different geographical areas.

Detailed methodology and analytical results from this analysis are available online in a ICRAF Working Paper (Zomer et al. 2014) at:

<http://www.worldagroforestry.org/downloads/Publications/PDFS/WP14064.pdf>

Spatial datasets from this global analysis of tree cover on agricultural land are available online at:

<http://www.worldagroforestry.org/global-tree-cover/index.html>

#### *Global Biomass Carbon Estimates:*

For Tier 1 global estimates of biomass carbon we used the “New IPCC Tier-1 Global Biomass Carbon Map For the Year 2000” (Ruesch and Gibbs, 2008) available from the Carbon Dioxide Information Analysis Center (CDIAC) Oakridge National Laboratory. This spatial delineation and global map of biomass carbon stored in above and belowground living vegetation was created using the International Panel on Climate Change (IPCC) Good Practice Guidance (Penman et al 2003; IPCC 2006) for reporting national greenhouse gas inventories. The global map is stratified into 124 strata (carbon zones), based on FAO ecofloristic zones, and which continent that zone is found. In each of those “carbon zones” a carbon value has been calculated for each GLC\_2000 landuse class in that zone. These values are available in tables, and apply across the whole of each carbon zone.

The authors state that this “... spatial database is likely the best available, globally-consistent map depicting vegetation carbon stocks, circa 2000”. It is based on widely accepted IPCC methods for estimating carbon stocks at the national level. However, the methods employed were not directly linked to ground-based measures of carbon stocks and have not been validated with field data. It is noted that croplands received the same carbon stock value regardless of the type of crop that might be growing.

To construct the Global Biomass Carbon Map, Ruesch and Gibbs (2008) used the IPCC GPG Tier-1 method for estimating vegetation carbon stocks using the globally consistent default values provided for aboveground biomass (IPCC 2006). Belowground biomass (root) carbon stocks were added using the IPCC root to shoot ratios for each vegetation type, and then total living vegetation biomass was converted to carbon stocks using the carbon fraction for each vegetation type ( which varies between forests, shrublands and grasslands). All estimates and conversions were specific to each continent, ecoregion

and vegetation type (stratified by age of forest). Thus, a total of 124 carbon zones or regions, each with a unique carbon stock value for each of the GLC\_2000 Landcover Classes found in that zone, were delineated, based on the IPCC Tier-1 methods and default values.

Available online from the Carbon Dioxide Information Analysis Center, Oak Ridge National Laboratory, Oak Ridge, Tennessee.

[http://cdiac.ornl.gov/epubs/ndp/global\\_carbon/carbon\\_documentation.html](http://cdiac.ornl.gov/epubs/ndp/global_carbon/carbon_documentation.html)

#### *Deriving the Global Tier 1 Estimates of Biomass Carbon on Agricultural Land:*

The IPCC Good Practice Guidance (Penman et al 2003) and Greenhouse Gas Inventory Guidelines (IPCC 2006) provide recommendations on methods and default values for assessing carbon stocks and emissions at three tiers of detail. Following the guidelines of the Intergovernmental Panel on Climate Change (IPCC) for National Greenhouse Gas Inventories<sup>28</sup> Ruesch & Gibbs (2008) identified a relatively low value (5 t C ha<sup>-1</sup>) for agricultural land, which has been applied uniformly and globally for Tier 1 estimates within the “Global Biomass Carbon Map for the Year 2000” dataset (Ruesch & Gibbs, 2008).

In order to account for the added contribution of tree cover on agricultural land, we use the default Tier 1 biomass carbon value for agricultural land (5tC/ha) as the baseline value, i.e. at 0% treecover the biomass carbon is 5tC/ha (in all carbon zones).

We use the biomass carbon value of the GLC\_2000 Mixed Forest class (or similar class in case this class is not present) in that same carbon zone as a surrogate biomass carbon value where there is full tree cover on agricultural land (i.e. tree cover percentage = 100). We then assume a linear increase in biomass carbon from 0 to 100 percent tree cover where, within a specific grid cell in a specific carbon zone:

- Biomass carbon is equal to the default tier 1 value for agricultural land (5 tC/ha) when there are no trees on that land,
  - (i.e. tree cover = 0%)
- There is an incremental linear increase of tC/ha proportionally as tree cover increases up to the maximum value for Mixed Forest in that specific carbon zone,
  - (i.e. biomass carbon values on agricultural land with 100% tree cover are equal to the related Mixed Forest class.)

Results were tabulated and mapped globally, by region, and by country. Spatial datasets resulting from this global analysis of carbon biomass on agricultural land are available online at:

<http://www.worldagroforestry.org/global-tree-cover/index.html>

## Supporting Information – Figures and Tables:

**Figure S1:** Average biomass carbon per hectare ( $\text{tC ha}^{-1}$ ) shown by the cumulative area of agricultural land ( $\text{km}^2$ ) with that amount of average biomass carbon, and as a percent (%) of total agricultural land globally. About 79% (17.5 million  $\text{km}^2$ ) had  $<25 \text{ t C ha}^{-1}$ , and 53% (5.7 million  $\text{km}^2$ ) had  $<10 \text{ t C ha}^{-1}$ .

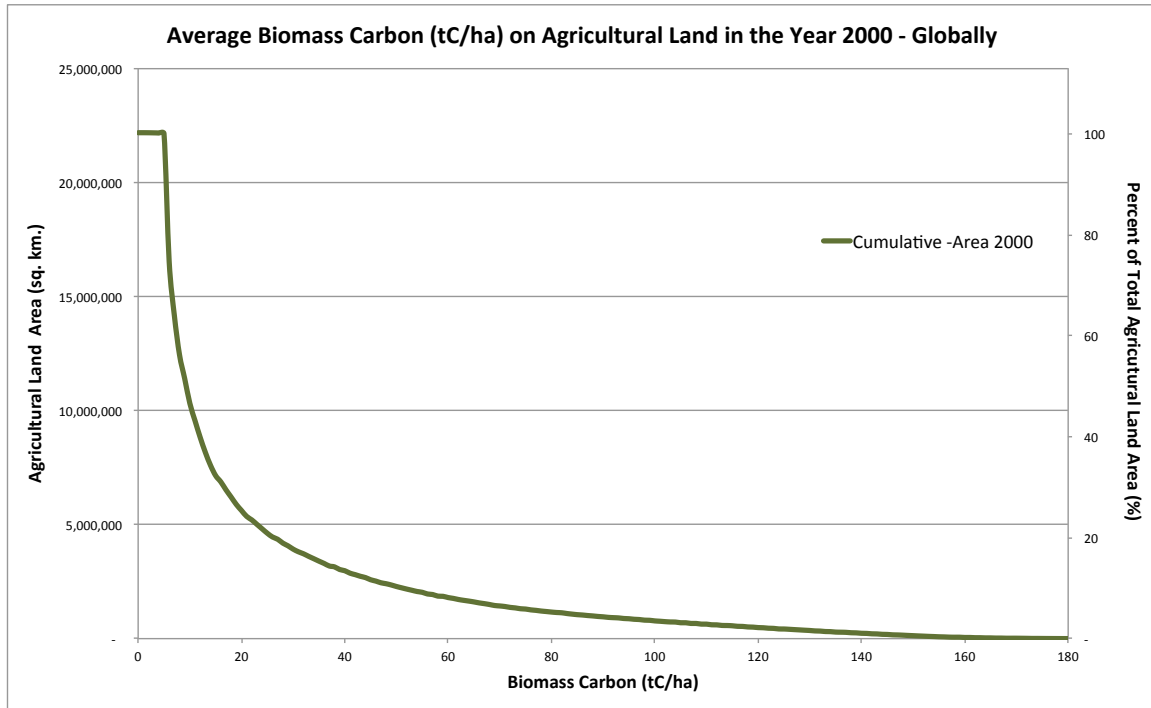

**Figure S2:** Areal extent of agricultural land (km<sup>2</sup>) as found within a set of biomass carbon classes (tC ha<sup>-1</sup>) in the year 2000 and 2010, by region, and the change in areal extent of agricultural land within these classes between the years 2000 and 2010. (Graphical representation of Table 2 in text).

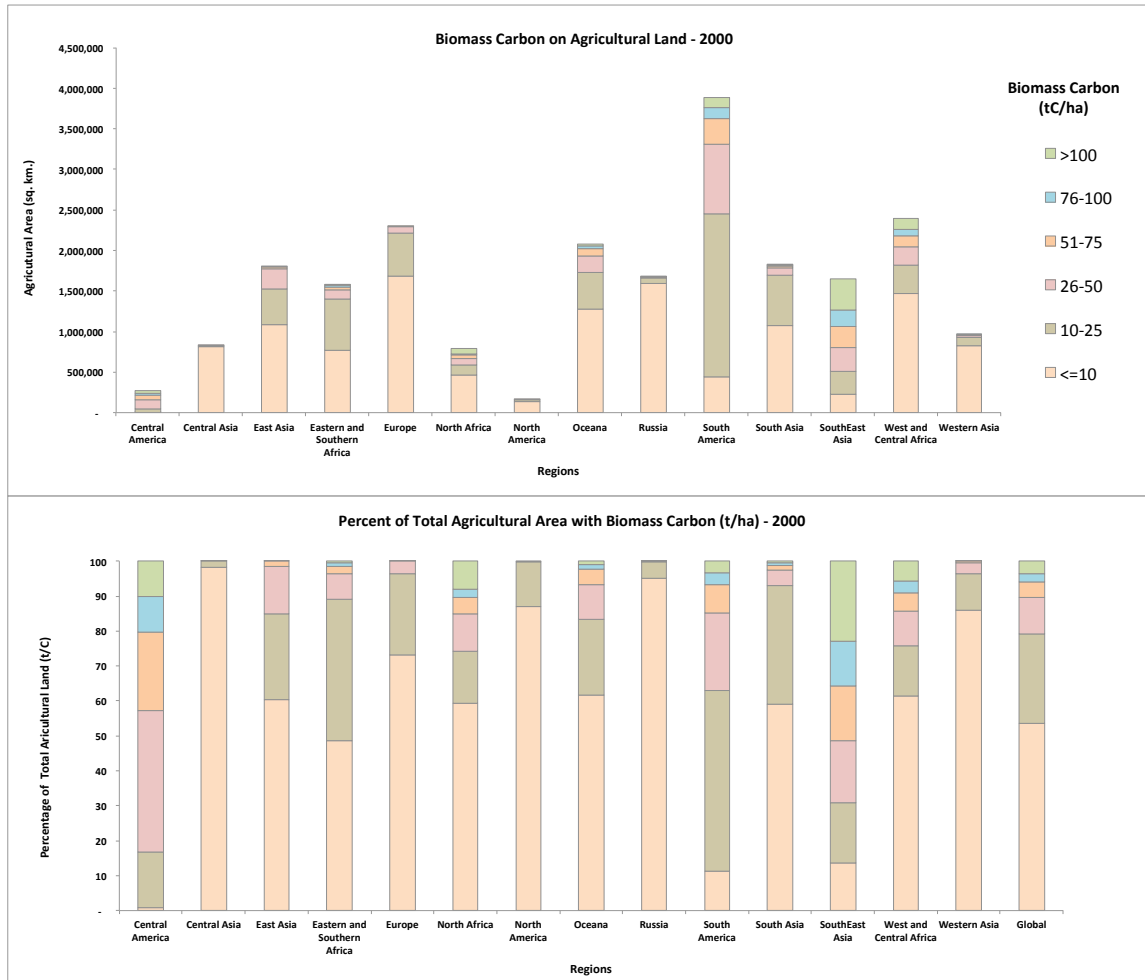

| Region                      | <=10              |           | 11-25            |           | 26-50            |           | 51-75           |          | 76-100          |          | >100            |          |
|-----------------------------|-------------------|-----------|------------------|-----------|------------------|-----------|-----------------|----------|-----------------|----------|-----------------|----------|
|                             | km <sup>2</sup>   | %         | km <sup>2</sup>  | %         | km <sup>2</sup>  | %         | km <sup>2</sup> | %        | km <sup>2</sup> | %        | km <sup>2</sup> | %        |
| Central America             | 2,127             | 1         | 42,684           | 16        | 109,089          | 41        | 60,978          | 23       | 27,172          | 10       | 27,185          | 10       |
| Central Asia                | 815,839           | 98        | 14,780           | 2         | 330              | 0         | -               | -        | -               | -        | -               | -        |
| East Asia                   | 1,081,961         | 60        | 444,831          | 25        | 243,055          | 14        | 25,484          | 1        | 562             | 0        | -               | -        |
| Eastern and Southern Africa | 765,194           | 49        | 635,878          | 40        | 114,282          | 7         | 33,601          | 2        | 16,242          | 1        | 8,330           | 1        |
| Europe                      | 1,685,506         | 73        | 532,058          | 23        | 80,826           | 4         | 1,376           | 0        | -               | -        | -               | -        |
| North Africa                | 468,621           | 59        | 119,134          | 15        | 82,632           | 10        | 38,960          | 5        | 18,302          | 2        | 63,009          | 8        |
| North America               | 135,591           | 87        | 20,029           | 13        | 328              | 0         | -               | -        | -               | -        | -               | -        |
| Oceania                     | 1,278,323         | 62        | 448,373          | 22        | 204,637          | 10        | 94,318          | 5        | 28,082          | 1        | 19,300          | 1        |
| Russia                      | 1,589,333         | 95        | 76,478           | 5         | 3,336            | 0         | 19              | 0        | -               | -        | -               | -        |
| South America               | 438,511           | 11        | 2,010,707        | 52        | 858,396          | 22        | 323,129         | 8        | 124,265         | 3        | 133,784         | 3        |
| South Asia                  | 1,077,780         | 59        | 620,558          | 34        | 83,891           | 5         | 21,555          | 1        | 12,733          | 1        | 10,508          | 1        |
| SouthEast Asia              | 225,389           | 14        | 284,365          | 17        | 291,315          | 18        | 257,278         | 16       | 211,736         | 13       | 378,185         | 23       |
| West and Central Africa     | 1,469,661         | 61        | 344,741          | 14        | 233,506          | 10        | 126,778         | 5        | 79,968          | 3        | 136,326         | 6        |
| Western Asia                | 820,847           | 86        | 101,556          | 11        | 28,923           | 3         | 4,353           | 0        | 10              | 0        | -               | -        |
| <b>Global Total</b>         | <b>11,854,683</b> | <b>53</b> | <b>5,696,172</b> | <b>26</b> | <b>2,334,546</b> | <b>11</b> | <b>987,829</b>  | <b>4</b> | <b>519,072</b>  | <b>2</b> | <b>776,627</b>  | <b>4</b> |



**Figure S3:** Areal extent of agricultural land (km<sup>2</sup>) as found within a set of biomass carbon classes (tC ha<sup>-1</sup>) in the year 2000 and 2010, by region, and the change in areal extent of agricultural land within these classes between the years 2000 and 2010. The majority of agricultural land has < 10 t C ha<sup>-1</sup>. (Graphical representation of Table 2 in text).

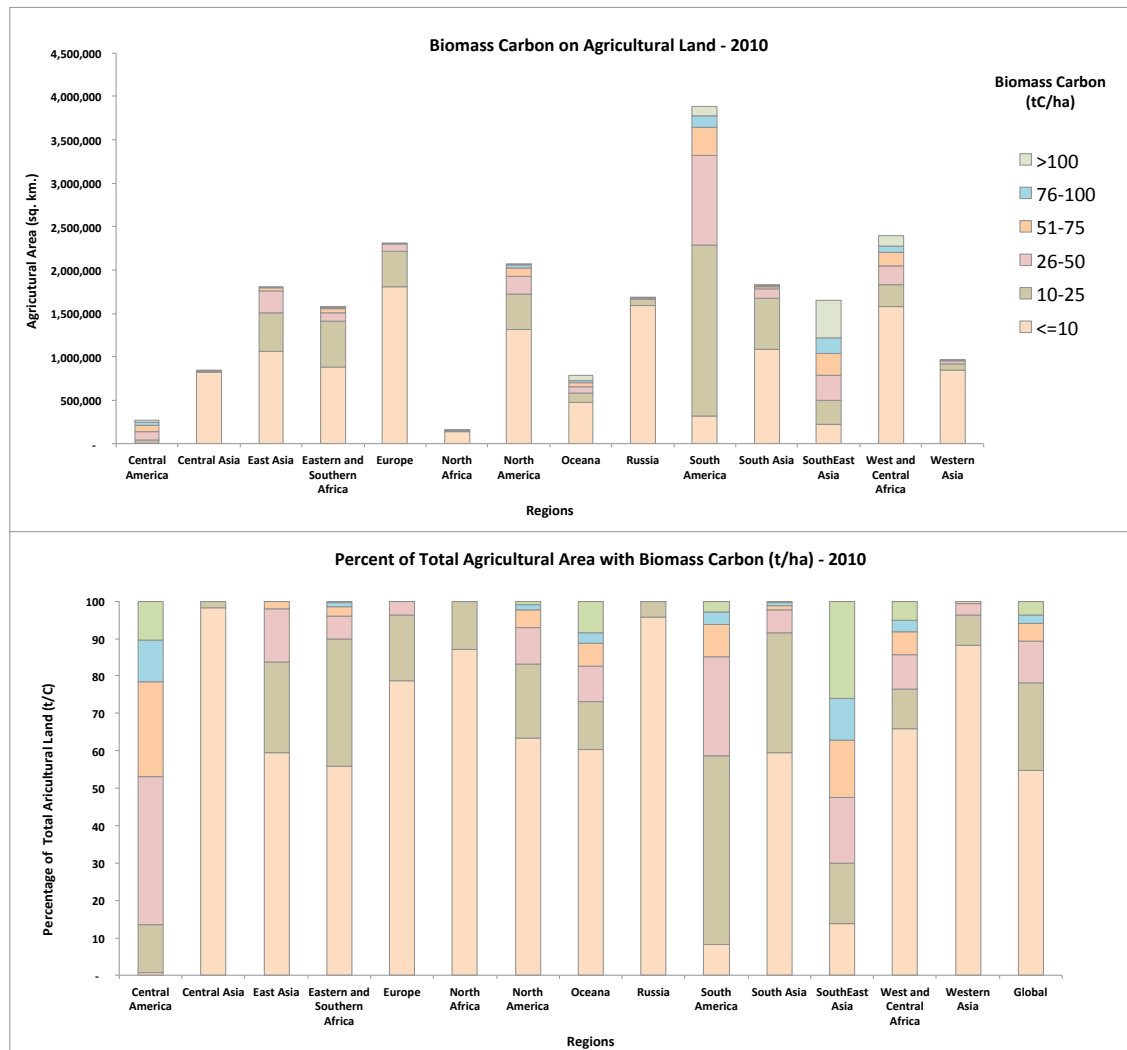

| Biomass Carbon on Agricultural Land - 2010 |                       |           |                  |           |                  |           |                  |          |                 |          |                 |          |
|--------------------------------------------|-----------------------|-----------|------------------|-----------|------------------|-----------|------------------|----------|-----------------|----------|-----------------|----------|
| Region                                     | Biomass C (t/ha) <=10 |           | 11-25            |           | 26-50            |           | 51-75            |          | 76-100          |          | >100            |          |
|                                            | km <sup>2</sup>       | %         | km <sup>2</sup>  | %         | km <sup>2</sup>  | %         | km <sup>2</sup>  | %        | km <sup>2</sup> | %        | km <sup>2</sup> | %        |
| Central America                            | 1,621                 | 1         | 34,942           | 13        | 106,168          | 39        | 68,229           | 25       | 30,360          | 11       | 27,915          | 10       |
| Central Asia                               | 816,972               | 98        | 13,678           | 2         | 299              | 0         | -                | -        | -               | -        | -               | -        |
| East Asia                                  | 1,066,727             | 59        | 438,840          | 24        | 255,198          | 14        | 34,410           | 2        | 718             | 0        | -               | -        |
| Eastern and Southern Africa                | 881,523               | 56        | 534,088          | 34        | 96,050           | 6         | 37,796           | 2        | 16,558          | 1        | 7,512           | 0        |
| Europe                                     | 1,809,606             | 79        | 406,180          | 18        | 83,223           | 4         | 757              | 0        | -               | -        | -               | -        |
| North Africa                               | 135,905               | 87        | 19,941           | 13        | 102              | 0         | -                | -        | -               | -        | -               | -        |
| North America                              | 1,313,470             | 63        | 411,039          | 20        | 204,567          | 10        | 96,319           | 5        | 29,221          | 1        | 18,417          | 1        |
| Oceania                                    | 476,741               | 60        | 102,461          | 13        | 73,334           | 9         | 48,337           | 6        | 22,538          | 3        | 67,247          | 9        |
| Russia                                     | 1,596,327             | 96        | 69,913           | 4         | 2,915            | 0         | 11               | 0        | -               | -        | -               | -        |
| South America                              | 321,760               | 8         | 1,964,145        | 51        | 1,028,356        | 26        | 334,189          | 9        | 124,305         | 3        | 116,037         | 3        |
| South Asia                                 | 1,086,309             | 59        | 588,574          | 32        | 109,596          | 6         | 22,977           | 1        | 10,740          | 1        | 8,829           | 0        |
| SouthEast Asia                             | 226,738               | 14        | 266,556          | 16        | 292,212          | 18        | 249,594          | 15       | 186,845         | 11       | 426,323         | 26       |
| West and Central Africa                    | 1,573,021             | 66        | 255,654          | 11        | 217,659          | 9         | 151,654          | 6        | 72,708          | 3        | 120,284         | 5        |
| Western Asia                               | 842,890               | 88        | 76,679           | 8         | 31,139           | 3         | 4,948            | 1        | 33              | 0        | -               | -        |
| <b>Global Total</b>                        | <b>12,149,610</b>     | <b>55</b> | <b>5,182,690</b> | <b>23</b> | <b>2,500,818</b> | <b>11</b> | <b>1,049,221</b> | <b>5</b> | <b>494,026</b>  | <b>2</b> | <b>792,564</b>  | <b>4</b> |

**Figure S4:** Carbon biomass (tC/ha) on agricultural land by Aridity-Wetness Index (AWI) in the year 2000 and 2010, globally and by global regions (Higher AWI values indicate more humid bioclimatic conditions).

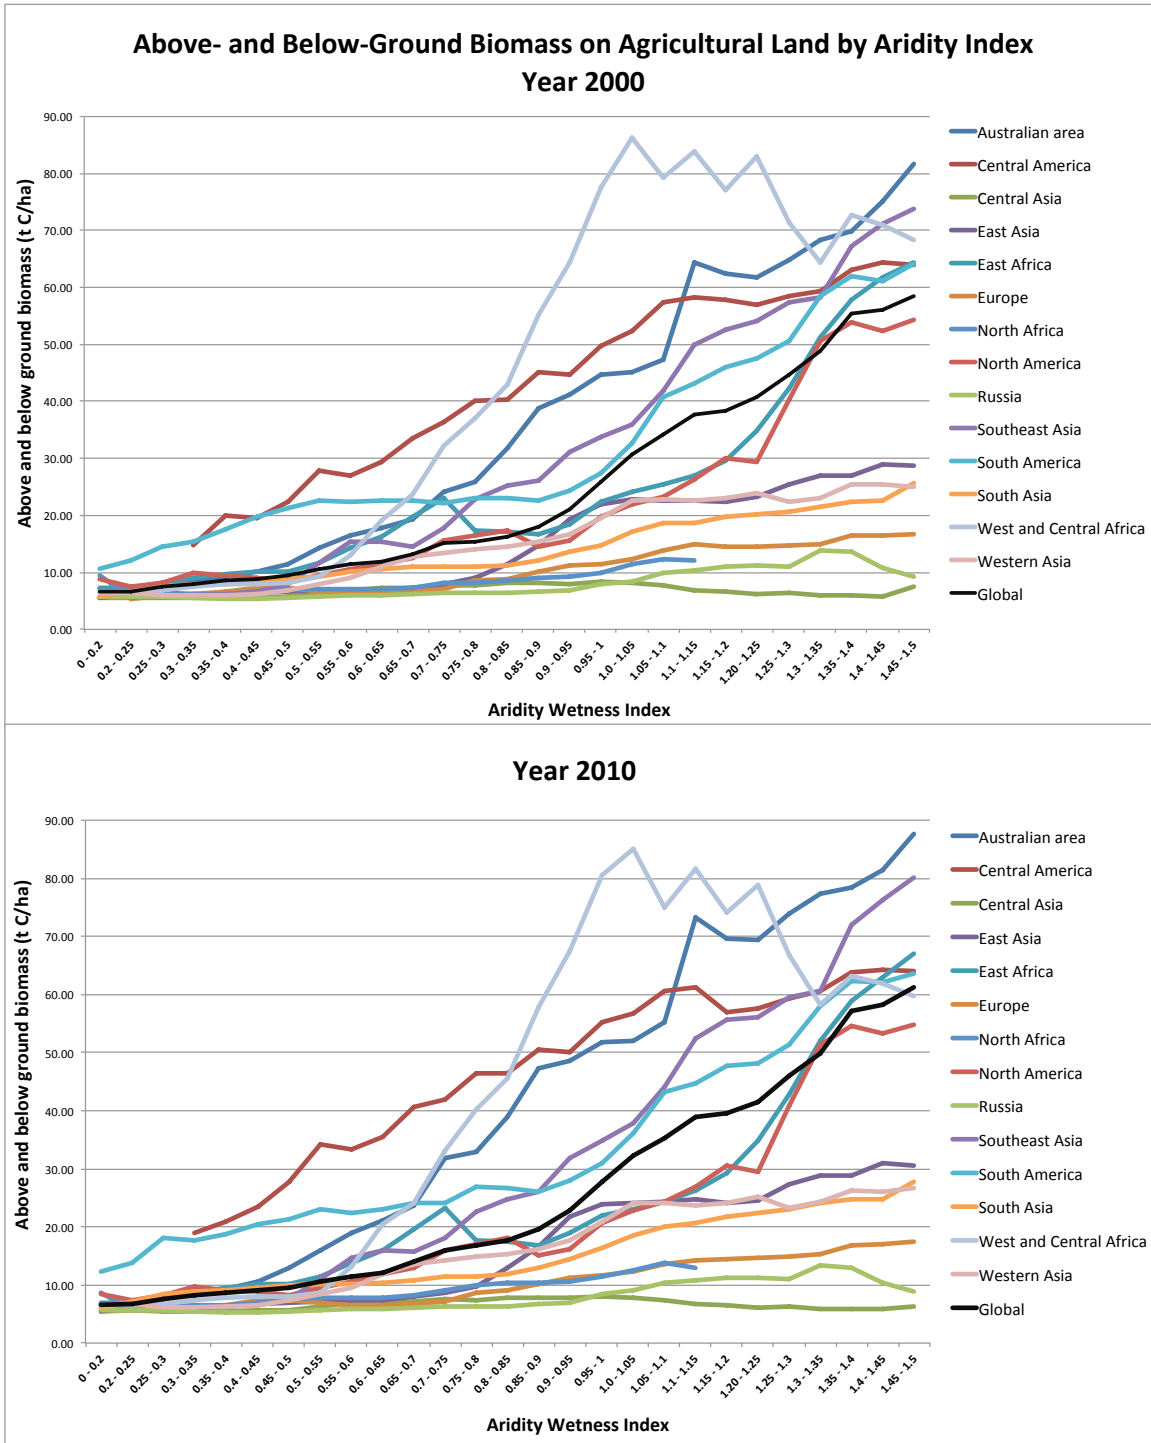

**Figure S5:** Average biomass carbon per hectare on agricultural land (tC ha<sup>-1</sup>) in 2000 and 2010, and the change in average biomass carbon from 2000 to 2010. Maps were produced based upon a spatial analysis using ESRI ArcGIS software (version 10.3; <http://www.esri.com/software/arcgis/arcgis-for-desktop>).

**IPCC Tier-1 Estimate of Change of Biomass Carbon on Agricultural Land  
2000 - 2010**

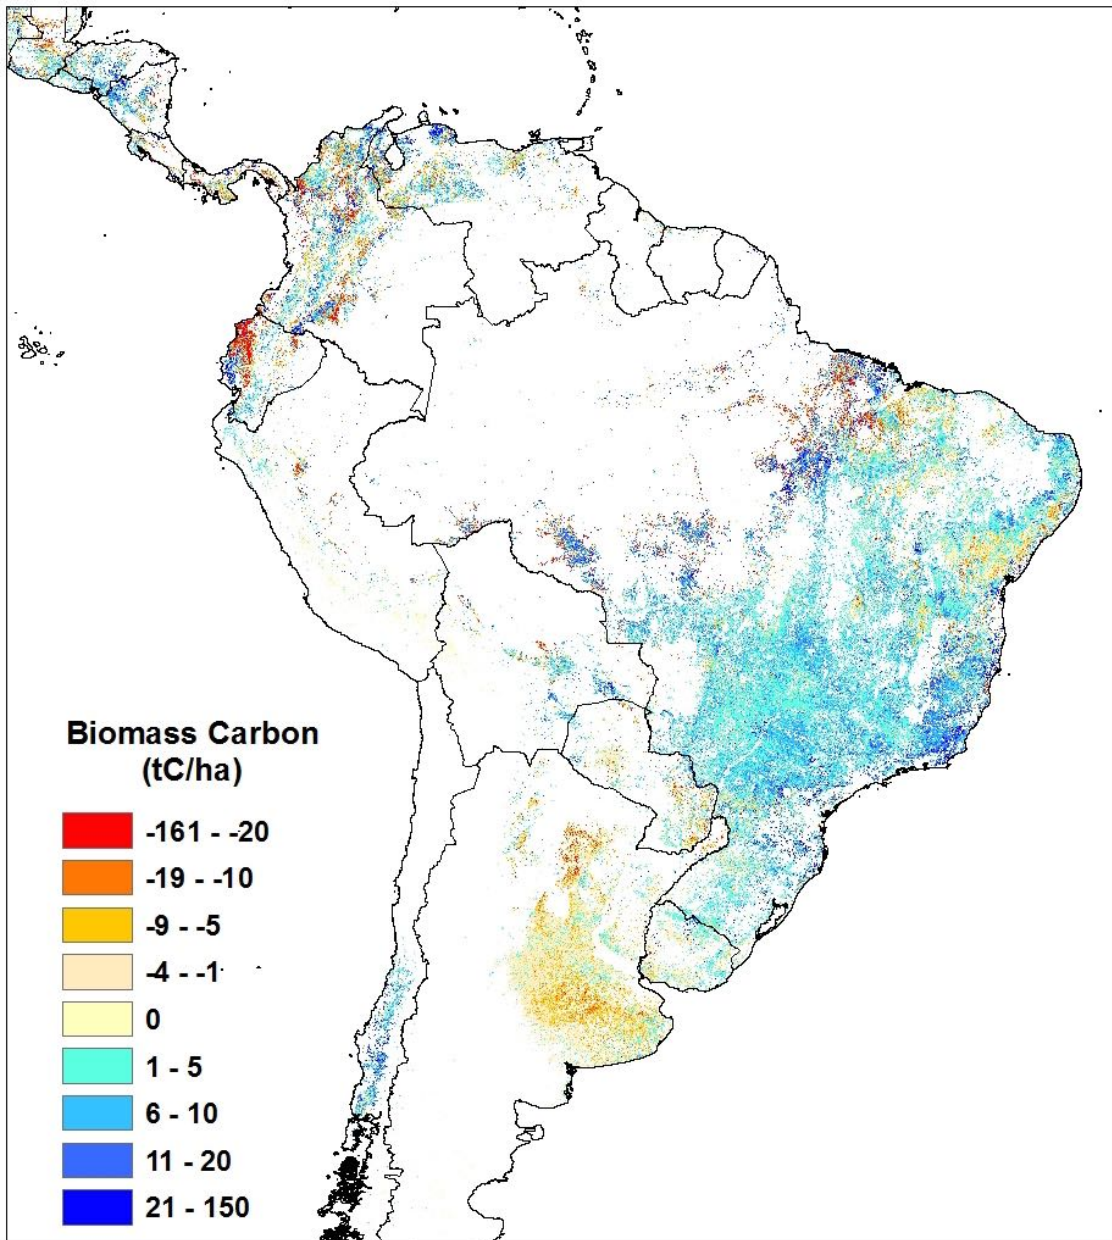

**Figure S6:** Average biomass carbon per hectare on agricultural land (tC ha<sup>-1</sup>) in 2000 and 2010, and the change in average biomass carbon from 2000 to 2010. Maps were produced based upon a spatial analysis using ESRI ArcGIS software (version 10.3; <http://www.esri.com/software/arcgis/arcgis-for-desktop>).

**IPCC Tier-1 Estimate of Change of Biomass Carbon on Agricultural Land  
2000 - 2010**

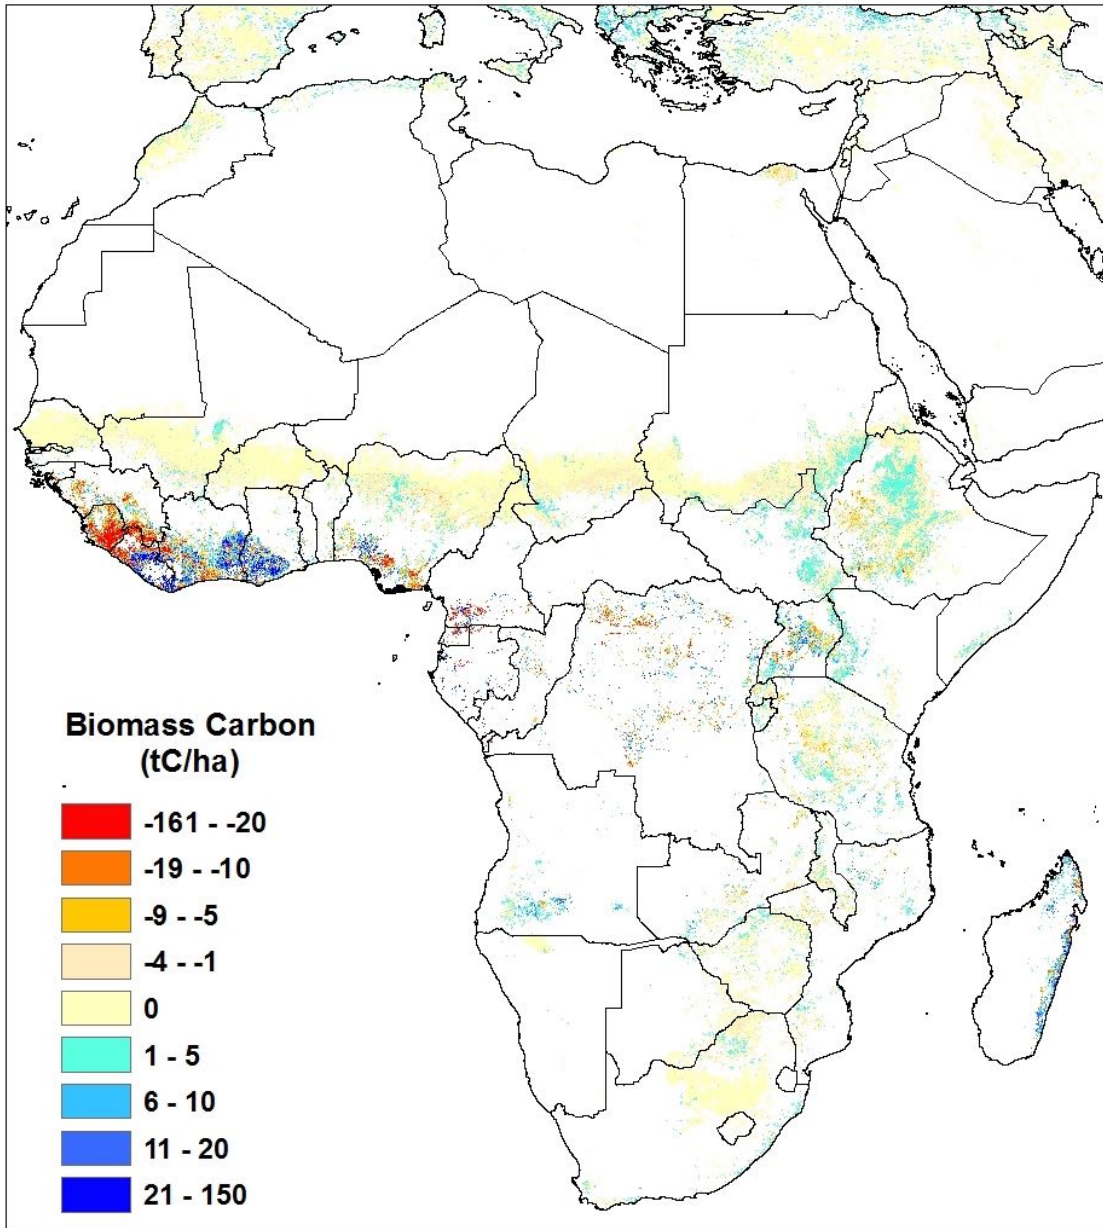



**Figure S7:** Average biomass carbon per hectare on agricultural land ( $\text{tC ha}^{-1}$ ) in 2000 and 2010, and the change in average biomass carbon from 2000 to 2010. Maps were produced based upon a spatial analysis using ESRI ArcGIS software (version 10.3; <http://www.esri.com/software/arcgis/arcgis-for-desktop>).

### IPCC Tier-1 Estimate of Change of Biomass Carbon on Agricultural Land 2000 - 2010

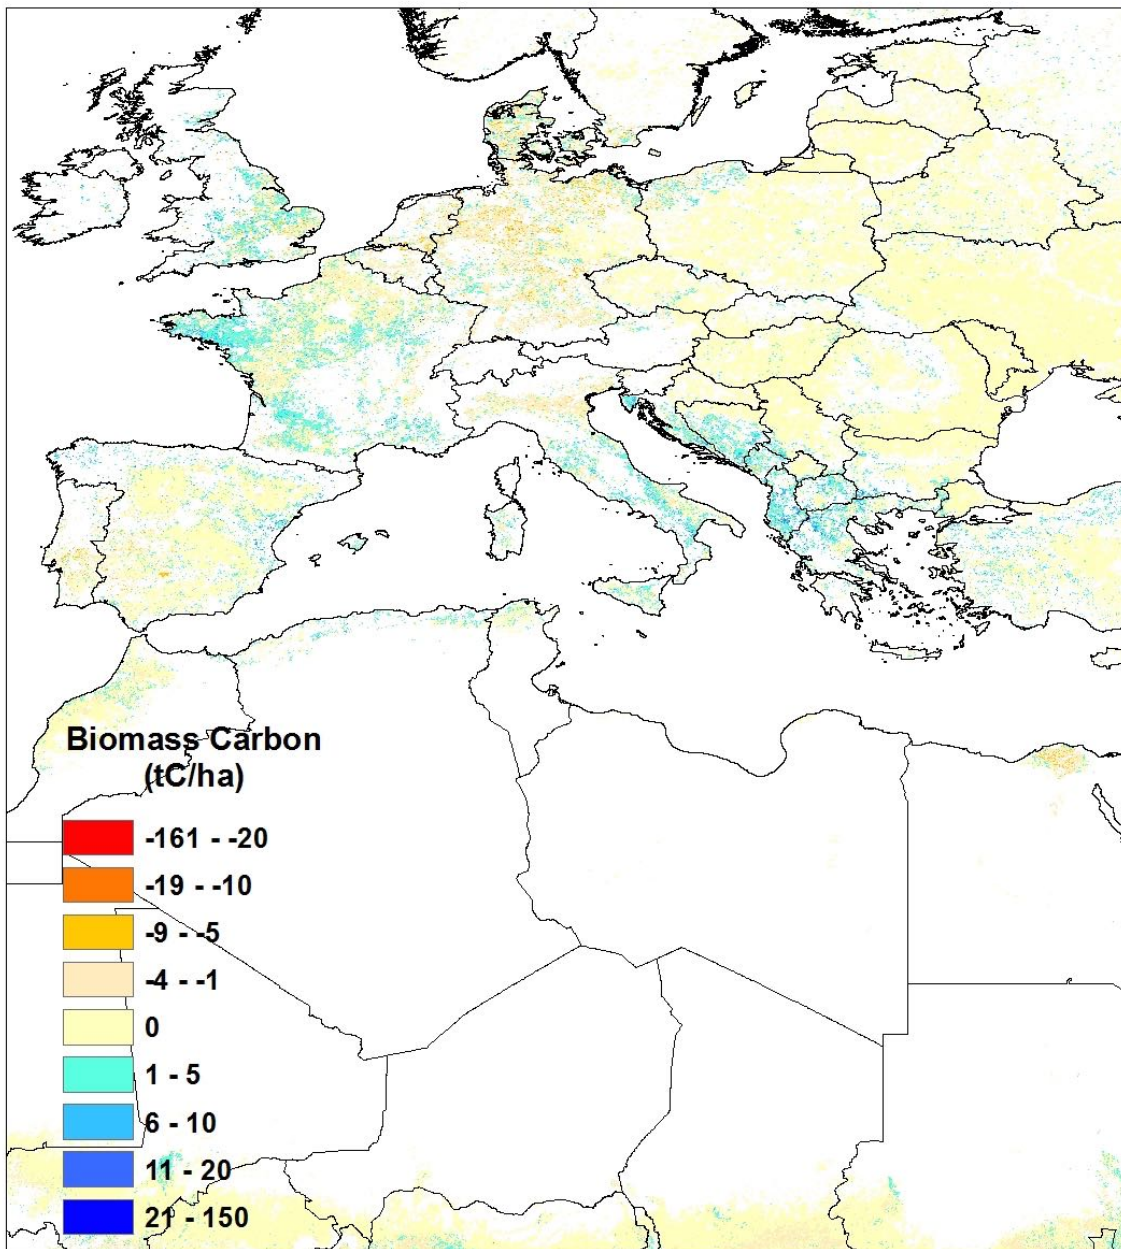

**Figure S8:** Average biomass carbon per hectare on agricultural land ( $\text{tC ha}^{-1}$ ) in 2000 and 2010, and the change in average biomass carbon from 2000 to 2010. Maps were produced based upon a spatial analysis using ESRI ArcGIS software (version 10.3; <http://www.esri.com/software/arcgis/arcgis-for-desktop>).

**IPCC Tier-1 Estimate of Change of Biomass Carbon on Agricultural Land  
2000 - 2010**

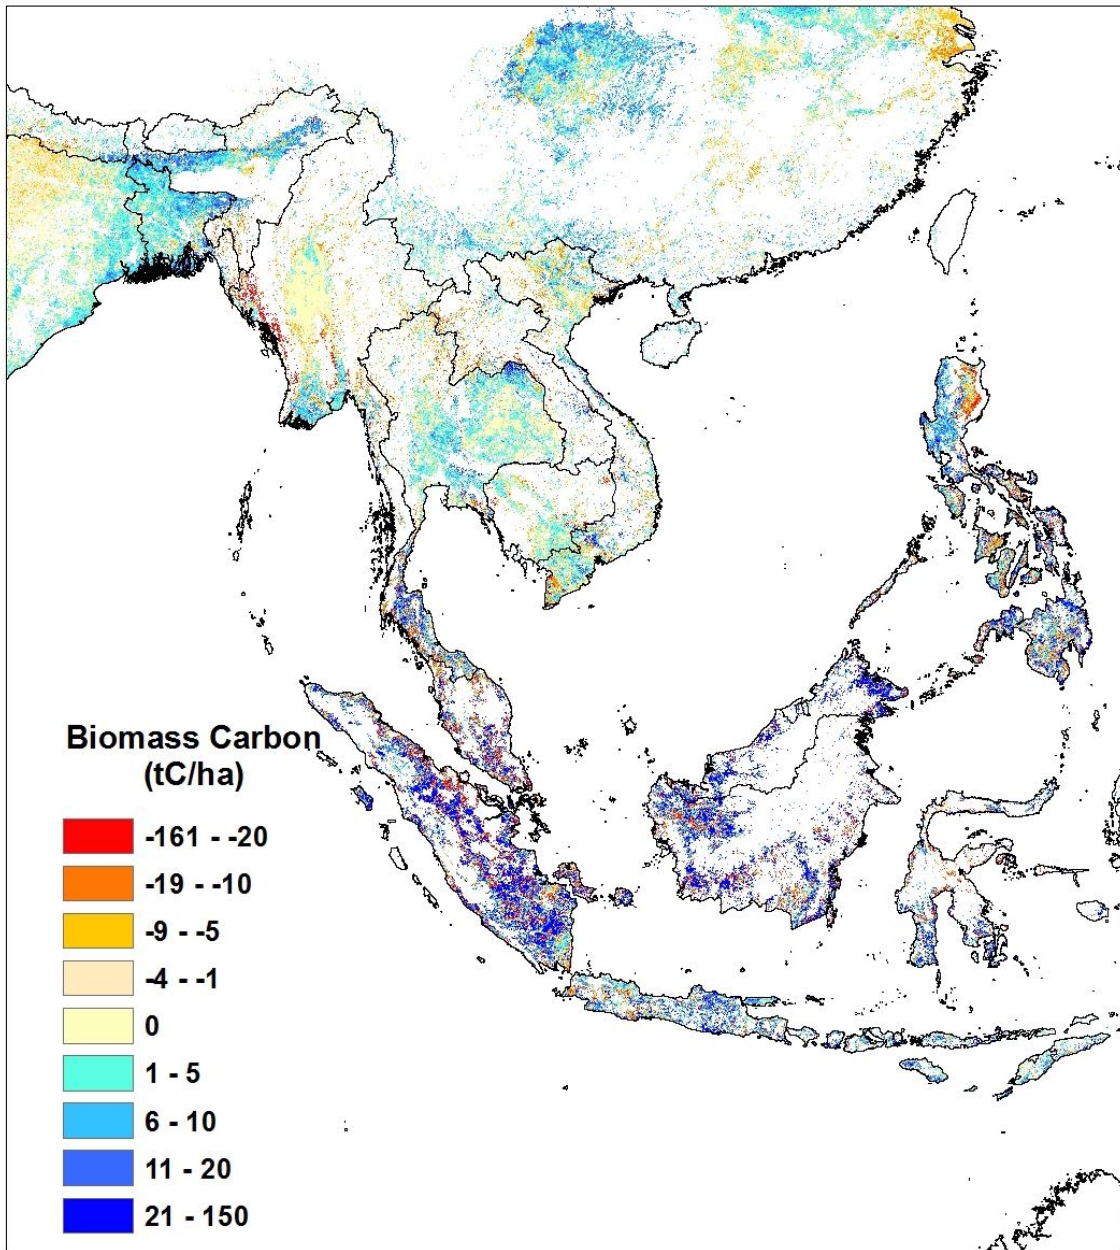



**Figure S9:** Average biomass carbon per hectare on agricultural land ( $\text{tC ha}^{-1}$ ) in 2000 and 2010, and the change in average biomass carbon from 2000 to 2010. Maps were produced based upon a spatial analysis using ESRI ArcGIS software (version 10.3; <http://www.esri.com/software/arcgis/arcgis-for-desktop>).

### IPCC Tier-1 Estimate of Change of Biomass Carbon on Agricultural Land 2000 - 2010

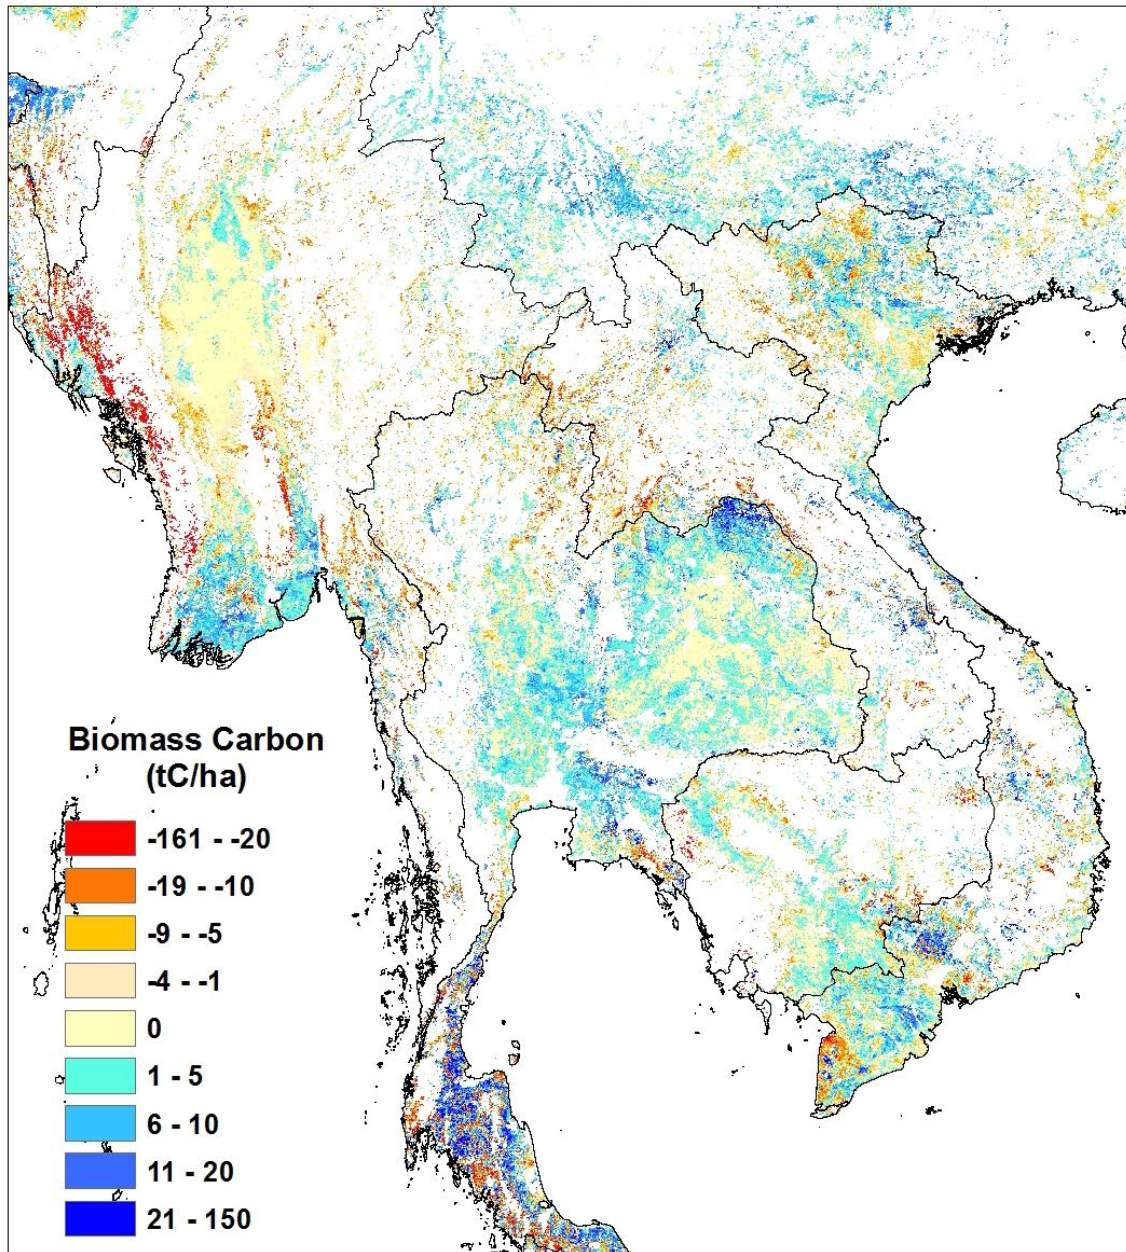

**Figure S10:** Average biomass carbon per hectare on agricultural land ( $\text{tC ha}^{-1}$ ) in 2000 and 2010, and the change in average biomass carbon from 2000 to 2010. Maps were produced based upon a spatial analysis using ESRI ArcGIS software (version 10.3; <http://www.esri.com/software/arcgis/arcgis-for-desktop>).

**IPCC Tier-1 Estimate of Change of Biomass Carbon on Agricultural Land  
2000 - 2010**

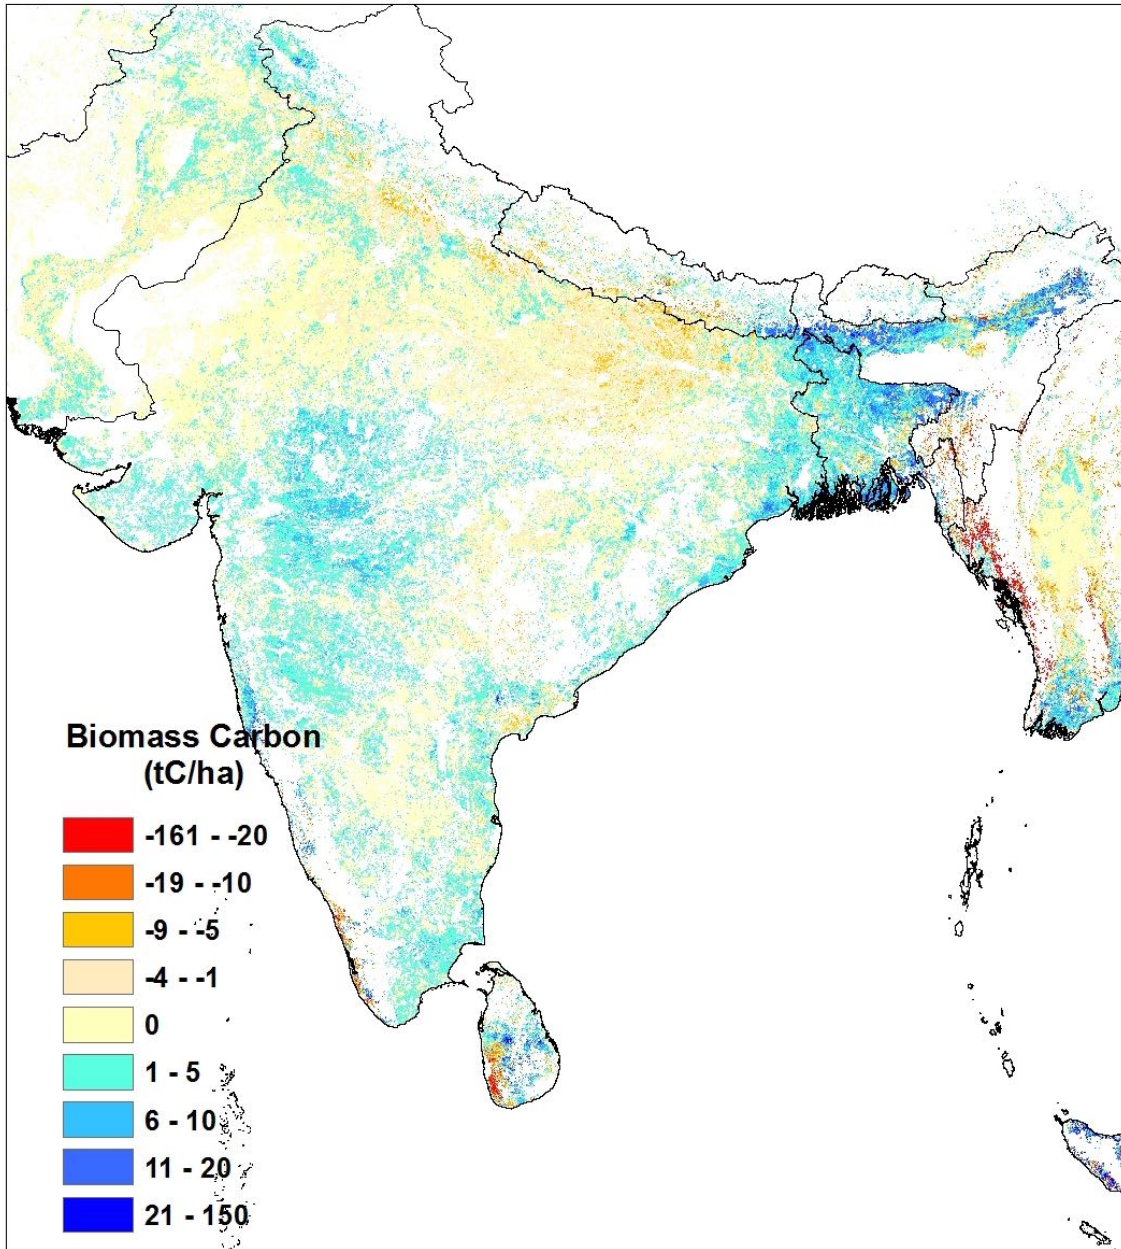



**Figure S11:** Average biomass carbon per hectare on agricultural land ( $\text{tC ha}^{-1}$ ) in 2000 and 2010, and the change in average biomass carbon from 2000 to 2010. Maps were produced based upon a spatial analysis using ESRI ArcGIS software (version 10.3; <http://www.esri.com/software/arcgis/arcgis-for-desktop>).

**IPCC Tier-1 Estimate of Change of Biomass Carbon on Agricultural Land  
2000 - 2010**

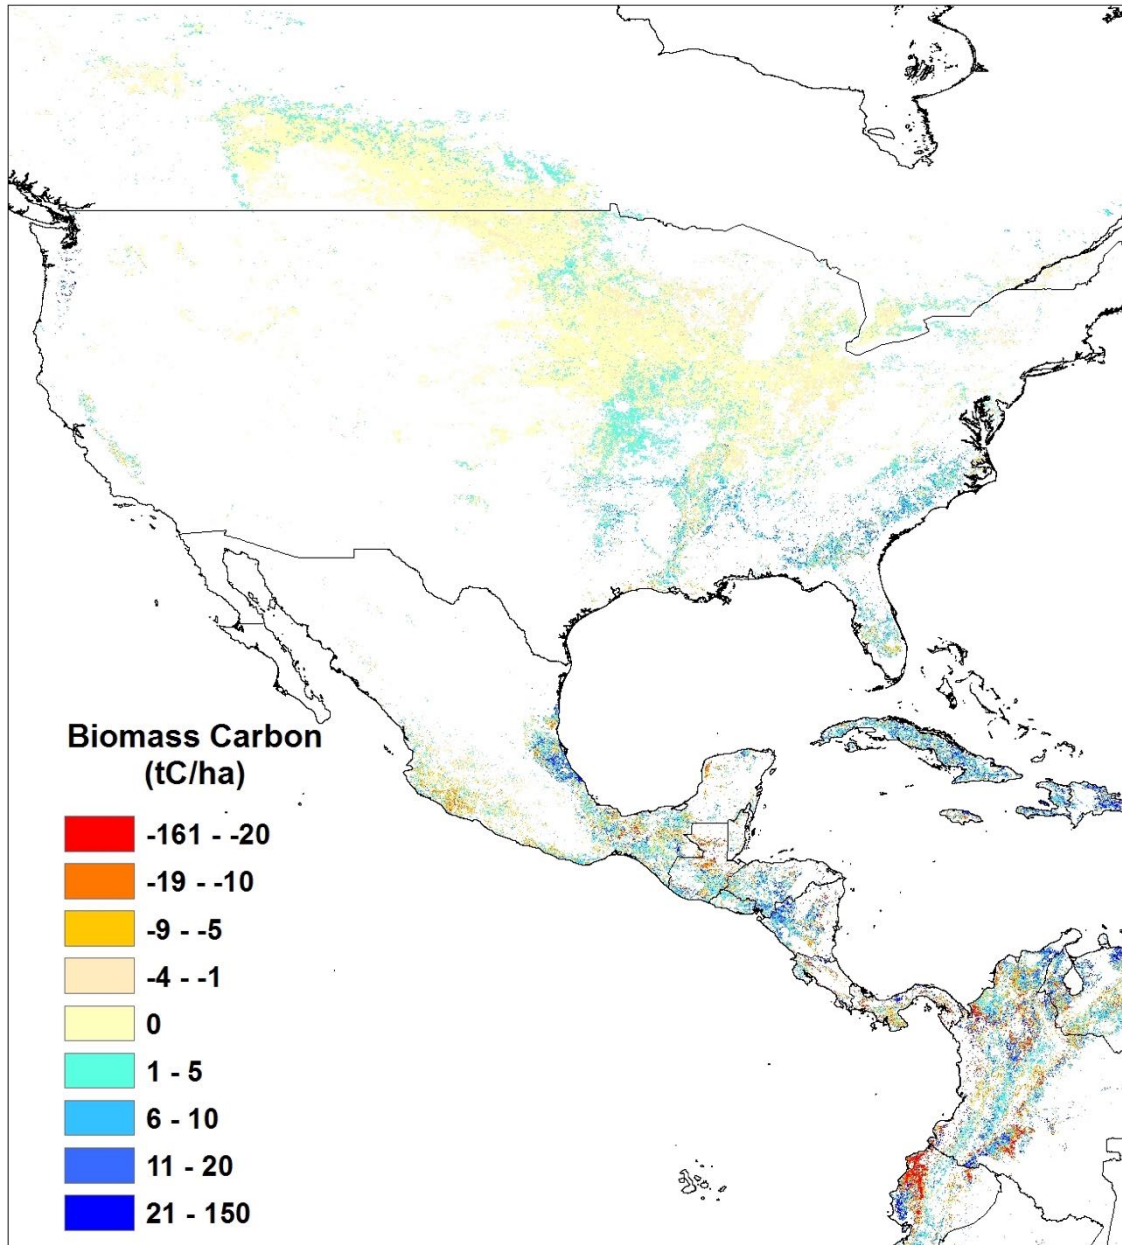

**Table S1:** Total biomass carbon on agricultural land (in PgC; and as a percentage of the total biomass carbon in 2000), and average per hectare biomass carbon (tC/ha), in the year 2000 and 2010 by country, grouped by region.

| Region                             | Country            | Total Biomass Carbon (million t C) |      |        |                        | Average Biomass Carbon |       |      | Total Agricultural Area (km <sup>2</sup> ) |
|------------------------------------|--------------------|------------------------------------|------|--------|------------------------|------------------------|-------|------|--------------------------------------------|
|                                    |                    | 2000                               | 2010 | Change | Increase as % of Total | t C / ha               |       |      |                                            |
| <b>Australia / Pacific</b>         |                    |                                    |      |        |                        |                        |       |      |                                            |
|                                    | Australia          | 595                                | 635  | 39.9   | 6.7                    | 10.0                   | 10.6  | 0.7  | 597,768                                    |
|                                    | Fiji               | 23                                 | 26   | 3.5    | 15.4                   | 81.4                   | 94.0  | 12.5 | 2,814                                      |
|                                    | New Caledonia      | 31                                 | 35   | 3.9    | 12.4                   | 59.3                   | 66.6  | 7.4  | 5,273                                      |
|                                    | New Zealand        | 309                                | 381  | 72.1   | 23.3                   | 40.2                   | 49.6  | 9.4  | 76,785                                     |
|                                    | Papua New Guinea   | 1094                               | 1140 | 46.0   | 4.2                    | 105.6                  | 110.0 | 4.4  | 103,583                                    |
|                                    | Vanuatu            | 56                                 | 60   | 4.7    | 8.5                    | 141.5                  | 153.6 | 12.0 | 3,929                                      |
| <b>Central America</b>             |                    |                                    |      |        |                        |                        |       |      |                                            |
|                                    | Belize             | 28                                 | 28   | 0.0    | -0.1                   | 74.1                   | 74.0  | -0.1 | 3,729                                      |
|                                    | Costa Rica         | 77                                 | 77   | 0.7    | 0.9                    | 65.0                   | 65.6  | 0.6  | 11,779                                     |
|                                    | Cuba               | 268                                | 302  | 34.0   | 12.7                   | 43.7                   | 49.3  | 5.6  | 61,207                                     |
|                                    | Dominican Republic | 114                                | 131  | 17.5   | 15.4                   | 63.4                   | 73.2  | 9.8  | 17,945                                     |
|                                    | El Salvador        | 44                                 | 47   | 2.9    | 6.6                    | 45.0                   | 48.0  | 3.0  | 9,745                                      |
|                                    | Guatemala          | 262                                | 256  | -6.3   | -2.4                   | 63.3                   | 61.8  | -1.5 | 41,401                                     |
|                                    | Haiti              | 57                                 | 69   | 11.7   | 20.6                   | 40.7                   | 49.1  | 8.4  | 14,003                                     |
|                                    | Honduras           | 184                                | 202  | 17.8   | 9.6                    | 50.5                   | 55.4  | 4.9  | 36,444                                     |
|                                    | Jamaica            | 40                                 | 41   | 1.1    | 2.9                    | 86.8                   | 89.3  | 2.5  | 4,564                                      |
|                                    | Nicaragua          | 191                                | 211  | 20.1   | 10.5                   | 48.5                   | 53.6  | 5.1  | 39,408                                     |
|                                    | Panama             | 144                                | 134  | -9.6   | -6.7                   | 53.2                   | 49.6  | -3.6 | 26,989                                     |
|                                    | Puerto Rico        | 12                                 | 14   | 1.9    | 16.4                   | 88.0                   | 102.5 | 14.4 | 1,343                                      |
| <b>Central Asia</b>                |                    |                                    |      |        |                        |                        |       |      |                                            |
|                                    | Kazakhstan         | 270                                | 265  | -4.6   | -1.7                   | 5.5                    | 5.4   | -0.1 | 492,142                                    |
|                                    | Kyrgyzstan         | 6                                  | 6    | -0.2   | -2.8                   | 6.8                    | 6.6   | -0.2 | 8,872                                      |
|                                    | Mongolia           | 151                                | 151  | 0.0    | 0.0                    | 6.2                    | 6.2   | 0.0  | 244,080                                    |
|                                    | Tajikistan         | 4                                  | 4    | 0.0    | -0.9                   | 5.9                    | 5.9   | -0.1 | 6,012                                      |
|                                    | Uzbekistan         | 32                                 | 32   | -0.1   | -0.4                   | 6.0                    | 6.0   | -0.0 | 53,086                                     |
| <b>East Asia</b>                   |                    |                                    |      |        |                        |                        |       |      |                                            |
|                                    | China              | 2153                               | 2320 | 166.4  | 7.7                    | 12.7                   | 13.7  | 1.0  | 1,692,194                                  |
|                                    | Japan              | 157                                | 153  | -3.2   | -2.0                   | 32.6                   | 32.0  | -0.7 | 47,997                                     |
|                                    | North Korea        | 14                                 | 14   | 0.0    | -0.0                   | 6.2                    | 6.2   | -0.0 | 22,659                                     |
|                                    | South Korea        | 38                                 | 39   | 0.8    | 2.0                    | 12.3                   | 12.6  | 0.2  | 31,124                                     |
|                                    | Taiwan             | 1                                  | 2    | 0.2    | 15.8                   | 16.0                   | 18.5  | 2.5  | 822                                        |
| <b>Eastern and Southern Africa</b> |                    |                                    |      |        |                        |                        |       |      |                                            |
|                                    | Angola             | 74                                 | 83   | 9.3    | 12.6                   | 14.6                   | 16.4  | 1.8  | 50,701                                     |
|                                    | Botswana           | 34                                 | 33   | -0.8   | -2.5                   | 7.2                    | 7.1   | -0.2 | 46,490                                     |
|                                    | Burundi            | 15                                 | 14   | -0.7   | -4.5                   | 16.0                   | 15.2  | -0.7 | 9,291                                      |
|                                    | Eritrea            | 17                                 | 17   | -0.7   | -4.0                   | 7.6                    | 7.3   | -0.3 | 22,580                                     |
|                                    | Ethiopia           | 584                                | 564  | -19.8  | -3.4                   | 13.4                   | 13.0  | -0.5 | 435,230                                    |
|                                    | Kenya              | 80                                 | 85   | 4.5    | 5.7                    | 13.6                   | 14.4  | 0.8  | 59,217                                     |
|                                    | Lesotho            | 3                                  | 3    | -0.1   | -1.8                   | 6.5                    | 6.3   | -0.1 | 4,503                                      |
|                                    | Madagascar         | 396                                | 420  | 24.1   | 6.1                    | 59.8                   | 63.4  | 3.6  | 66,178                                     |
|                                    | Malawi             | 39                                 | 37   | -1.3   | -3.5                   | 12.3                   | 11.9  | -0.4 | 31,219                                     |
|                                    | Mozambique         | 109                                | 105  | -4.0   | -3.6                   | 15.3                   | 14.7  | -0.6 | 71,335                                     |
|                                    | Namibia            | 9                                  | 10   | 0.4    | 4.6                    | 5.1                    | 5.4   | 0.2  | 17,929                                     |
|                                    | Rwanda             | 17                                 | 16   | -1.1   | -6.3                   | 13.4                   | 12.5  | -0.8 | 12,938                                     |
|                                    | Somalia            | 12                                 | 13   | 0.9    | 7.2                    | 9.8                    | 10.5  | 0.7  | 12,336                                     |
|                                    | South Africa       | 173                                | 174  | 0.5    | 0.3                    | 7.3                    | 7.3   | 0.0  | 237,806                                    |
|                                    | Tanzania           | 264                                | 248  | -15.9  | -6.0                   | 11.6                   | 10.9  | -0.7 | 226,692                                    |
|                                    | Uganda             | 297                                | 302  | 4.8    | 1.6                    | 32.8                   | 33.3  | 0.5  | 90,560                                     |
|                                    | Zambia             | 89                                 | 85   | -4.0   | -4.4                   | 14.2                   | 13.6  | -0.6 | 62,813                                     |
|                                    | Zimbabwe           | 90                                 | 90   | -0.5   | -0.5                   | 7.9                    | 7.9   | -0.0 | 114,048                                    |

**Table S1 (continued):** Total biomass carbon on agricultural land (in PgC; and as a percentage of the total biomass carbon in 2000), and average per hectare biomass carbon (tC/ha), in the year 2000 and 2010 by country, grouped by region.

| Region                  | Country                | Total Biomass Carbon (million t C) |      |        |                        | Average Biomass Carbon |      |        | Total Agricultural Area (km <sup>2</sup> ) |
|-------------------------|------------------------|------------------------------------|------|--------|------------------------|------------------------|------|--------|--------------------------------------------|
|                         |                        | t C * 10 <sup>6</sup>              |      |        | Increase as % of Total | t C / ha               |      |        |                                            |
|                         |                        | 2000                               | 2010 | Change |                        | 2000                   | 2010 | Change |                                            |
| <b>Eurasia (Russia)</b> |                        |                                    |      |        |                        |                        |      |        |                                            |
|                         | Russia                 | 1067                               | 1067 | 0.2    | 0.0                    | 6.4                    | 6.4  | 0.0    | 1,668,977                                  |
| <b>Europe</b>           |                        |                                    |      |        |                        |                        |      |        |                                            |
|                         | Albania                | 16                                 | 20   | 4.5    | 28.6                   | 10.9                   | 14.0 | 3.1    | 14,489                                     |
|                         | Austria                | 12                                 | 12   | 0.1    | 0.8                    | 9.4                    | 9.5  | 0.1    | 12,829                                     |
|                         | Belarus                | 71                                 | 74   | 2.4    | 3.4                    | 6.6                    | 6.8  | 0.2    | 108,507                                    |
|                         | Belgium                | 17                                 | 15   | -1.4   | -8.5                   | 16.1                   | 14.7 | -1.4   | 10,247                                     |
|                         | Bosnia and Herzegovina | 39                                 | 43   | 3.2    | 8.2                    | 13.6                   | 14.7 | 1.1    | 28,947                                     |
|                         | Bulgaria               | 40                                 | 43   | 3.0    | 7.4                    | 6.4                    | 6.9  | 0.5    | 62,433                                     |
|                         | Croatia                | 27                                 | 29   | 1.8    | 6.8                    | 10.2                   | 10.9 | 0.7    | 26,571                                     |
|                         | Czech Republic         | 31                                 | 31   | -0.3   | -1.0                   | 8.0                    | 8.0  | -0.1   | 38,496                                     |
|                         | Denmark                | 44                                 | 42   | -2.2   | -5.0                   | 15.8                   | 15.0 | -0.8   | 27,700                                     |
|                         | Estonia                | 13                                 | 13   | -0.1   | -0.7                   | 7.7                    | 7.7  | -0.1   | 17,398                                     |
|                         | Finland                | 23                                 | 22   | -1.0   | -4.5                   | 13.3                   | 12.7 | -0.6   | 17,083                                     |
|                         | France                 | 335                                | 349  | 13.8   | 4.1                    | 13.5                   | 14.1 | 0.6    | 248,310                                    |
|                         | Germany                | 280                                | 256  | -23.5  | -8.4                   | 16.5                   | 15.1 | -1.4   | 169,860                                    |
|                         | Greece                 | 36                                 | 43   | 6.9    | 19.1                   | 9.6                    | 11.4 | 1.8    | 37,540                                     |
|                         | Hungary                | 39                                 | 41   | 1.5    | 3.9                    | 5.9                    | 6.1  | 0.2    | 66,719                                     |
|                         | Ireland                | 4                                  | 5    | 0.5    | 11.1                   | 18.0                   | 20.0 | 2.0    | 2,295                                      |
|                         | Italy                  | 112                                | 115  | 3.3    | 2.9                    | 12.1                   | 12.5 | 0.4    | 92,263                                     |
|                         | Kosovo                 | 5                                  | 6    | 0.4    | 8.2                    | 7.5                    | 8.1  | 0.6    | 7,217                                      |
|                         | Latvia                 | 21                                 | 21   | -0.2   | -0.7                   | 7.4                    | 7.4  | -0.1   | 28,738                                     |
|                         | Lithuania              | 26                                 | 26   | 0.1    | 0.4                    | 6.7                    | 6.7  | 0.0    | 38,410                                     |
|                         | Luxembourg             | 1                                  | 1    | 0.0    | -3.2                   | 21.3                   | 20.7 | -0.7   | 640                                        |
|                         | Macedonia              | 10                                 | 12   | 2.3    | 22.9                   | 8.8                    | 10.8 | 2.0    | 11,555                                     |
|                         | Moldova                | 18                                 | 18   | -0.1   | -0.6                   | 5.9                    | 5.8  | -0.0   | 30,083                                     |
|                         | Montenegro             | 13                                 | 14   | 0.9    | 7.1                    | 18.9                   | 20.3 | 1.3    | 7,005                                      |
|                         | Netherlands            | 26                                 | 23   | -2.9   | -11.3                  | 18.8                   | 16.7 | -2.1   | 13,788                                     |
|                         | Norway                 | 15                                 | 14   | -0.5   | -3.3                   | 9.1                    | 8.8  | -0.3   | 16,200                                     |
|                         | Poland                 | 133                                | 135  | 1.7    | 1.2                    | 7.7                    | 7.8  | 0.1    | 173,199                                    |
|                         | Portugal               | 24                                 | 22   | -2.6   | -10.7                  | 10.8                   | 9.6  | -1.1   | 22,727                                     |
|                         | Romania                | 83                                 | 85   | 2.4    | 2.9                    | 6.1                    | 6.3  | 0.2    | 135,482                                    |
|                         | Serbia                 | 35                                 | 37   | 1.7    | 4.8                    | 6.9                    | 7.2  | 0.3    | 50,792                                     |
|                         | Slovakia               | 13                                 | 13   | 0.3    | 2.5                    | 7.1                    | 7.3  | 0.2    | 18,168                                     |
|                         | Slovenia               | 4                                  | 4    | -0.1   | -3.1                   | 11.7                   | 11.3 | -0.4   | 3,341                                      |
|                         | Spain                  | 170                                | 173  | 3.8    | 2.2                    | 7.6                    | 7.8  | 0.2    | 221,765                                    |
|                         | Sweden                 | 32                                 | 32   | -0.8   | -2.6                   | 11.7                   | 11.4 | -0.3   | 27,783                                     |
|                         | Switzerland            | 3                                  | 3    | -0.2   | -6.3                   | 16.8                   | 15.8 | -1.1   | 1,686                                      |
|                         | Ukraine                | 274                                | 272  | -2.2   | -0.8                   | 6.1                    | 6.0  | -0.0   | 451,254                                    |
|                         | United Kingdom         | 86                                 | 90   | 3.9    | 4.5                    | 14.8                   | 15.5 | 0.7    | 58,019                                     |
| <b>North Africa</b>     |                        |                                    |      |        |                        |                        |      |        |                                            |
|                         | Algeria                | 12                                 | 14   | 2.0    | 16.2                   | 7.0                    | 8.1  | 1.1    | 17,609                                     |
|                         | Egypt                  | 30                                 | 26   | -4.0   | -13.3                  | 14.8                   | 12.8 | -2.0   | 20,207                                     |
|                         | Libya                  | 2                                  | 2    | 0.0    | -1.2                   | 5.2                    | 5.2  | -0.1   | 3,000                                      |
|                         | Mauritania             | 15                                 | 15   | 0.0    | -0.3                   | 5.7                    | 5.7  | -0.0   | 26,831                                     |
|                         | Morocco                | 49                                 | 50   | 1.4    | 2.9                    | 6.3                    | 6.5  | 0.2    | 77,767                                     |
|                         | Tunisia                | 6                                  | 7    | 0.6    | 9.5                    | 6.1                    | 6.6  | 0.6    | 10,487                                     |
| <b>North America</b>    |                        |                                    |      |        |                        |                        |      |        |                                            |
|                         | Canada                 | 333                                | 346  | 12.7   | 3.8                    | 7.6                    | 7.9  | 0.3    | 439,934                                    |
|                         | Mexico                 | 1251                               | 1250 | -0.8   | -0.1                   | 47.0                   | 47.0 | -0.0   | 266,087                                    |
|                         | United States          | 1727                               | 1804 | 76.8   | 4.4                    | 12.6                   | 13.2 | 0.6    | 1,366,923                                  |

**Table S1 (continued):** Total biomass carbon on agricultural land (in PgC; and as a percentage of the total biomass carbon in 2000), and average per hectare biomass carbon (tC/ha), in the year 2000 and 2010 by country, grouped by region.

| Region                         | Country                  | Total Biomass Carbon (million t C) |      |        |                        | Average Biomass Carbon |       |        | Total Agricultural Area (km <sup>2</sup> ) |
|--------------------------------|--------------------------|------------------------------------|------|--------|------------------------|------------------------|-------|--------|--------------------------------------------|
|                                |                          | t C * 10 <sup>6</sup>              |      |        | Increase as % of Total | t C / ha               |       |        |                                            |
|                                |                          | 2000                               | 2010 | Change |                        | 2000                   | 2010  | Change |                                            |
| <b>South America</b>           |                          |                                    |      |        |                        |                        |       |        |                                            |
|                                | Argentina                | 874                                | 699  | -175.0 | -20.0                  | 17.8                   | 14.2  | -3.6   | 491,951                                    |
|                                | Bolivia                  | 284                                | 297  | 12.5   | 4.4                    | 40.1                   | 41.9  | 1.8    | 70,932                                     |
|                                | Brazil                   | 6790                               | 7729 | 938.8  | 13.8                   | 26.8                   | 30.5  | 3.7    | 2,535,884                                  |
|                                | Chile                    | 153                                | 189  | 35.7   | 23.4                   | 31.2                   | 38.5  | 7.3    | 49,040                                     |
|                                | Colombia                 | 1499                               | 1493 | -5.8   | -0.4                   | 52.7                   | 52.4  | -0.2   | 284,672                                    |
|                                | Ecuador                  | 413                                | 376  | -37.6  | -9.1                   | 50.6                   | 46.0  | -4.6   | 81,712                                     |
|                                | French Guiana            | 5                                  | 6    | 0.9    | 18.3                   | 83.1                   | 98.3  | 15.2   | 599                                        |
|                                | Guyana                   | 18                                 | 18   | 0.2    | 1.2                    | 50.1                   | 50.7  | 0.6    | 3,541                                      |
|                                | Paraguay                 | 235                                | 221  | -14.2  | -6.0                   | 29.1                   | 27.4  | -1.8   | 80,714                                     |
|                                | Peru                     | 278                                | 278  | -0.9   | -0.3                   | 37.5                   | 37.4  | -0.1   | 74,301                                     |
|                                | Suriname                 | 13                                 | 14   | 0.3    | 2.3                    | 62.5                   | 64.0  | 1.4    | 2,112                                      |
|                                | Uruguay                  | 129                                | 134  | 4.1    | 3.2                    | 19.8                   | 20.4  | 0.6    | 65,346                                     |
|                                | Venezuela                | 647                                | 677  | 29.4   | 4.5                    | 44.0                   | 46.0  | 2.0    | 147,179                                    |
| <b>South Asia</b>              |                          |                                    |      |        |                        |                        |       |        |                                            |
|                                | Bangladesh               | 207                                | 248  | 41.0   | 19.8                   | 20.3                   | 24.4  | 4.0    | 101,875                                    |
|                                | Bhutan                   | 28                                 | 30   | 1.8    | 6.5                    | 43.8                   | 46.7  | 2.9    | 6,394                                      |
|                                | India                    | 1834                               | 1970 | 136.0  | 7.4                    | 11.2                   | 12.0  | 0.8    | 1,640,067                                  |
|                                | Nepal                    | 109                                | 109  | -0.4   | -0.4                   | 22.1                   | 22.0  | -0.1   | 49,422                                     |
|                                | Sri Lanka                | 119                                | 121  | 1.9    | 1.6                    | 41.1                   | 41.7  | 0.6    | 29,056                                     |
| <b>SouthEast Asia</b>          |                          |                                    |      |        |                        |                        |       |        |                                            |
|                                | Cambodia                 | 102                                | 96   | -5.7   | -5.6                   | 18.2                   | 17.2  | -1.0   | 55,846                                     |
|                                | East Timor               | 36                                 | 39   | 3.0    | 8.4                    | 56.2                   | 60.9  | 4.7    | 6,387                                      |
|                                | Indonesia                | 5493                               | 6007 | 513.9  | 9.4                    | 88.3                   | 96.6  | 8.3    | 621,762                                    |
|                                | Laos                     | 248                                | 236  | -11.8  | -4.8                   | 54.0                   | 51.4  | -2.6   | 45,916                                     |
|                                | Malaysia                 | 1034                               | 1140 | 105.8  | 10.2                   | 96.9                   | 106.8 | 9.9    | 106,718                                    |
|                                | Myanmar                  | 553                                | 496  | -57.2  | -10.3                  | 28.7                   | 25.7  | -3.0   | 193,138                                    |
|                                | Philippines              | 1394                               | 1458 | 64.7   | 4.6                    | 73.7                   | 77.1  | 3.4    | 189,123                                    |
|                                | Thailand                 | 696                                | 738  | 41.9   | 6.0                    | 25.3                   | 26.8  | 1.5    | 275,437                                    |
|                                | Vietnam                  | 452                                | 457  | 4.6    | 1.0                    | 30.0                   | 30.3  | 0.3    | 150,843                                    |
| <b>West and Central Africa</b> |                          |                                    |      |        |                        |                        |       |        |                                            |
|                                | Benin                    | 24                                 | 22   | -1.3   | -5.6                   | 12.7                   | 12.0  | -0.7   | 18,576                                     |
|                                | Burkina Faso             | 110                                | 106  | -3.6   | -3.2                   | 6.5                    | 6.3   | -0.2   | 168,316                                    |
|                                | Cameroon                 | 225                                | 209  | -16.6  | -7.4                   | 34.0                   | 31.5  | -2.5   | 66,206                                     |
|                                | Central African Republic | 15                                 | 14   | -0.2   | -1.5                   | 14.0                   | 13.8  | -0.2   | 10,418                                     |
|                                | Chad                     | 191                                | 179  | -12.0  | -6.3                   | 7.4                    | 6.9   | -0.5   | 257,824                                    |
|                                | Cote d'Ivoire            | 641                                | 684  | 43.7   | 6.8                    | 42.9                   | 45.8  | 2.9    | 149,304                                    |
|                                | D. R. Congo              | 1372                               | 1350 | -21.8  | -1.6                   | 113.0                  | 111.2 | -1.8   | 121,384                                    |
|                                | Equatorial Guinea        | 40                                 | 33   | -7.0   | -17.6                  | 93.8                   | 77.3  | -16.5  | 4,273                                      |
|                                | Gabon                    | 100                                | 105  | 4.5    | 4.5                    | 89.3                   | 93.3  | 4.0    | 11,213                                     |
|                                | Gambia                   | 6                                  | 6    | 0.0    | -0.8                   | 9.0                    | 9.0   | -0.1   | 6,485                                      |
|                                | Ghana                    | 271                                | 332  | 61.1   | 22.6                   | 35.6                   | 43.7  | 8.1    | 75,900                                     |
|                                | Guinea                   | 352                                | 303  | -49.0  | -13.9                  | 52.2                   | 45.0  | -7.3   | 67,377                                     |
|                                | Guinea-Bissau            | 18                                 | 17   | -0.6   | -3.2                   | 50.1                   | 48.5  | -1.6   | 3,607                                      |
|                                | Liberia                  | 443                                | 442  | -0.7   | -0.1                   | 78.6                   | 78.5  | -0.1   | 56,353                                     |
|                                | Mali                     | 166                                | 163  | -2.7   | -1.6                   | 7.0                    | 6.8   | -0.1   | 238,245                                    |
|                                | Niger                    | 15                                 | 15   | -0.1   | -0.4                   | 5.9                    | 5.9   | -0.0   | 25,437                                     |
|                                | Nigeria                  | 545                                | 513  | -31.6  | -5.8                   | 12.8                   | 12.1  | -0.7   | 425,128                                    |
|                                | Republic of Congo        | 134                                | 138  | 3.8    | 2.9                    | 96.9                   | 99.7  | 2.8    | 13,830                                     |
|                                | Senegal                  | 74                                 | 72   | -1.5   | -2.0                   | 6.6                    | 6.5   | -0.1   | 112,190                                    |
|                                | Sierra Leone             | 370                                | 279  | -91.2  | -24.7                  | 67.7                   | 51.0  | -16.7  | 54,642                                     |
|                                | South Sudan              | 163                                | 171  | 8.6    | 5.3                    | 11.3                   | 11.9  | 0.6    | 144,182                                    |
|                                | Sudan                    | 284                                | 281  | -3.3   | -1.2                   | 8.1                    | 8.0   | -0.1   | 352,163                                    |
|                                | Togo                     | 13                                 | 13   | -0.2   | -1.7                   | 19.9                   | 19.5  | -0.3   | 6,484                                      |

**Table S1 (continued):** Total biomass carbon on agricultural land (in PgC; and as a percentage of the total biomass carbon in 2000), and average per hectare biomass carbon (tC/ha), in the year 2000 and 2010 by country, grouped by region.

| Region              | Country      | Total Biomass Carbon (million t C) |      |        |                        | Average Biomass Carbon |      |        | Total Agricultural Area (km <sup>2</sup> ) |
|---------------------|--------------|------------------------------------|------|--------|------------------------|------------------------|------|--------|--------------------------------------------|
|                     |              | t C * 10 <sup>6</sup>              |      |        | Increase as % of Total | t C / ha               |      |        |                                            |
|                     |              | 2000                               | 2010 | Change |                        | 2000                   | 2010 | Change |                                            |
| <b>Western Asia</b> |              |                                    |      |        |                        |                        |      |        |                                            |
|                     | Afghanistan  | 62                                 | 63   | 0.9    | 1.4                    | 5.2                    | 5.3  | 0.1    | 118,720                                    |
|                     | Armenia      | 15                                 | 15   | 0.8    | 5.2                    | 11.8                   | 12.4 | 0.6    | 12,403                                     |
|                     | Azerbaijan   | 31                                 | 32   | 0.2    | 0.7                    | 9.5                    | 9.5  | 0.1    | 33,220                                     |
|                     | Cyprus       | 1                                  | 1    | 0.0    | -1.5                   | 6.2                    | 6.1  | -0.1   | 1,951                                      |
|                     | Georgia      | 42                                 | 45   | 2.7    | 6.5                    | 21.9                   | 23.3 | 1.4    | 19,187                                     |
|                     | Iran         | 81                                 | 82   | 0.9    | 1.1                    | 7.0                    | 7.1  | 0.1    | 115,378                                    |
|                     | Iraq         | 28                                 | 28   | 0.1    | 0.3                    | 5.3                    | 5.3  | 0.0    | 52,831                                     |
|                     | Israel       | 2                                  | 2    | 0.1    | 4.4                    | 6.7                    | 6.9  | 0.3    | 3,093                                      |
|                     | Jordan       | 1                                  | 1    | 0.0    | 1.4                    | 5.4                    | 5.5  | 0.1    | 2,142                                      |
|                     | Lebanon      | 1                                  | 1    | 0.1    | 5.9                    | 6.8                    | 7.2  | 0.4    | 1,720                                      |
|                     | Pakistan     | 206                                | 217  | 11.1   | 5.4                    | 7.5                    | 8.0  | 0.4    | 273,210                                    |
|                     | Palestine    | 1                                  | 1    | 0.0    | 4.4                    | 5.3                    | 5.5  | 0.2    | 1,381                                      |
|                     | Saudi Arabia | 4                                  | 4    | 0.0    | 0.3                    | 5.1                    | 5.1  | 0.0    | 8,443                                      |
|                     | Syria        | 8                                  | 9    | 0.2    | 2.1                    | 6.2                    | 6.3  | 0.1    | 13,677                                     |
|                     | Turkey       | 263                                | 282  | 18.5   | 7.0                    | 9.0                    | 9.6  | 0.6    | 291,990                                    |
|                     | Turkmenistan | 14                                 | 14   | -0.1   | -0.4                   | 5.2                    | 5.2  | -0.0   | 26,874                                     |
|                     | Yemen        | 3                                  | 3    | 0.0    | 0.7                    | 5.9                    | 5.9  | 0.0    | 5,538                                      |
